# Supplementary material for: Novel double nanoemulsion loading of Cordyceps militaris extract: formulation, stability, in vitro digestion, and in vivo evaluation for regulation of acute lipid disorders
Source: Royal Society of Chemistry journal article supplement (doi:10.1039/d5fo03188e), 2025-01-01
Supplement: d5fo03188e1.pdf [file d5fo03188e1.pdf]

## ELECTRONIC SUPPORTING INFORMATION

### **Novel Double Nanoemulsion Loading of *Cordyceps militaris* Extract: Formulation, Stability, *In Vitro* Digestion, and *In Vivo* Evaluation for Regulation of Acute Lipid Disorders**

**Nguyen Thanh Tan<sup>1,2</sup>, Phan Minh Vuong<sup>2</sup>, Nguyen Quynh Dao<sup>1,3</sup>, Tran Chi Dung<sup>4</sup>, Huynh Thi Nhan<sup>5</sup>, Pham Quynh Nhu<sup>2,6</sup>, Nguyen Dang Hai Dang, Tran Quang Hieu<sup>7\*</sup>**

<sup>1</sup>Institute of Biotechnology and Food Technology, Industrial University of Ho Chi Minh City, 12 Nguyen Van Bao Street, Ho Chi Minh City 700000, Vietnam

<sup>2</sup>Institute of Advanced Technology, Vietnam Academy of Science and Technology, 1A TL29, Thanh Loc Ward, Ho Chi Minh City 700000, Vietnam

<sup>3</sup>Faculty of Food Technology -Saigon Technology University, Ho Chi Minh City, Vietnam, 180 Cao Lo Street, Chanh Hung Ward, Ho Chi Minh City 700000, Vietnam

<sup>5</sup>Faculty of Chemical HCM University of Education, 280 An Duong Vuong, Ho Chi Minh City 700000, Vietnam

<sup>e</sup>Faculty of Chemical Engineering, Industrial University of Ho Chi Minh City, 12 Nguyen Van Bao, Go Vap, Ho Chi Minh City 700000, Vietnam

<sup>6</sup>School of Science, Engineering and Technology, RMIT University, 702 Nguyen Van Linh, Tan Hung Ward, Ho Chi Minh City 700000, Vietnam.

<sup>7</sup>Chemistry Division -Basic Sciences Department-Saigon Technology University, 180 Cao Lo, Chanh Hung Ward, Ho Chi Minh City 700000, Vietnam

\*Corresponding author: [hieu.tranquang@stu.edu.vn](mailto:hieu.tranquang@stu.edu.vn)

### **Table contents**

**Table S1.** Effect of PGPR content

**Table S2.** Effect of SOWR

**Table S3.** Effect of CaCl<sub>2</sub> concentration

**Table S4.** Effect of HLB<sub>mix</sub>

**Table S5.** Effect of SOR

**Table S6.** Effect of SOWR

**Figure S1:** Chromatogram of emulsifier content analysis at SWR 7.5% (first measurement).

**Figure S2:** Chromatogram of *Cordyceps militaris* dry extract solution content in the oil phase at SWOR 40% (first measurement).

**Figure S3:** Chromatogram evaluating the effect of refined palm oil (acid value 0.16 mg KOH/g) on the W1/O emulsion (first measurement).

**Figure S4:** Chromatogram evaluating the effect of crude oil (acid value 2.96 mg KOH/g) on the W1/O emulsion (first measurement).

**Figure S5:** Chromatogram evaluating the effect of  $\text{CaCl}_2$  at 1% (first measurement).

**Figure S6:** Chromatogram evaluating the effect of HLB value 12 on the double nanoemulsion system (first measurement).

**Figure S7:** Chromatogram evaluating the effect of emulsifier content at SOR 20% on the double nanoemulsion system (first measurement).

**Figure S8:** Chromatogram evaluating the effect of primary emulsion content in the aqueous phase at SOWR 20% on the double nanoemulsion system (first measurement).

**Figure S9:** Chromatogram evaluating the effect of ultrasonic power (350 W) on the double nanoemulsion system (first measurement).

**Figure S10:** Chromatogram evaluating the effect of ultrasonication time (6 minutes) on the double nanoemulsion system (first measurement).

**Figure S11:** Particle size of the double nanoemulsion system at HLB value 12 measured by DLS (first measurement).

**Figure S12:** Particle size of the double nanoemulsion system at SOR 20% measured by DLS (first measurement).

**Figure S13:** Particle size of the double nanoemulsion system at SOWR 20% measured by DLS (first measurement).

**Figure S14:** Particle size of the double nanoemulsion system at ultrasonic power 350 W measured by DLS (first measurement).

**Figure S15:** Particle size of the double nanoemulsion system at ultrasonication time (6 minutes) measured by DLS (first measurement).

**Figure S16:** Zeta potential of the NCMs double nanoemulsion system (first measurement).

**Figure S17.** Zero- order model in SGF

**Figure S18.** Higuchi model in SGF

**Figure S19.** Korsmeyer-Peppas model in SGF

**Figure S20.** Zero-model in SIF

**Figure S21.** Higuchi model in SIF

**Figure S22.** COR\_KP model in SIF

**Figure S23.** ADE\_KP model in SIF

**Table S1.** Effect of PGPR content

| No | PGPR,<br>g<br>(m1) | W1, g<br>(m2) | Oil, g<br>(m3) | CaCl <sub>2</sub> , g | SWR, % | SWOR,<br>% | EE %        |             | Visual<br>appearance    |
|----|--------------------|---------------|----------------|-----------------------|--------|------------|-------------|-------------|-------------------------|
|    |                    |               |                |                       |        |            | ADE         | COR         |                         |
| 1  | 0.638              | 10            | 24.82          | 0.03                  | 6.0    | 30.0       | 93.2 ± 1.3  | 92.5 ± 0.86 | Separated               |
| 2  | 0.695              | 10            | 24.95          | 0.03                  | 6.5    | 30.0       | 93.2 ± 1.1  | 92.2 ± 1.2  | Separated               |
| 3  | 0.753              | 10            | 25.08          | 0.03                  | 7.0    | 30.0       | 93.2 ± 1.0  | 92.5 ± 1.0  | Separated               |
| 4  | 0.811              | 10            | 25.22          | 0.03                  | 7.5    | 30.0       | 93.3 ± 0.87 | 92.3 ± 0.46 | Homogeneous<br>emulsion |
| 5  | 0.87               | 10            | 25.36          | 0.03                  | 8.0    | 30.0       | 93.9 ± 1.0  | 92.7 ± 0.48 | Homogeneous<br>emulsion |
| 6  | 0.929              | 10            | 25.5           | 0.03                  | 8.5    | 30.0       | 92.7 ± 1.1  | 92.1 ± 1.1  | Homogeneous<br>emulsion |

**Table S2.** Effect of SOWR

| No | PGPR,<br>g<br>(m1) | Extract<br>, g<br>(m2) | Oil (m3) | CaCl <sub>2</sub> , % | SWR,<br>% | SOWR,<br>% | EE %        |             |                          |
|----|--------------------|------------------------|----------|-----------------------|-----------|------------|-------------|-------------|--------------------------|
|    |                    |                        |          |                       |           |            | ADE         | COR         |                          |
| 1  | 0.811              | 10                     | 25.22    | 1                     | 7.5       | 30.0       | 96.8 ± 0.64 | 96.3 ± 0.60 | <b>Visual appearence</b> |
| 2  | 0.811              | 10                     | 20.12    | 1                     | 7.5       | 35.0       | 97.5 ± 0.76 | 97.0 ± 0.66 | Hệ nhũ tương đồng nhất   |
| 3  | 0.811              | 10                     | 16.2     | 1                     | 7.5       | 40.0       | 97.2 ± 0.68 | 96.9 ± 0.59 | Homogeneous emulsion     |
| 4  | 0.811              | 10                     | 13.2     | 1                     | 7.5       | 45.0       | 96.6 ± 0.59 | 96.2 ± 0.84 | Homogeneous emulsion     |
| 5  | 0.811              | 10                     | 10.8     | 1                     | 7.5       | 50.0       | -           | -           | Separated                |

**Table S3.** Effect of CaCl<sub>2</sub> concentration

| No | PGPR, g<br>(m1) | Extract,<br>g<br>(m2) | Oil<br>(m3) | CaCl <sub>2</sub> , % | SWR, % | SWOR, % | EE %       |             | Visual appearance    |
|----|-----------------|-----------------------|-------------|-----------------------|--------|---------|------------|-------------|----------------------|
|    |                 |                       |             |                       |        |         | ADE        | COR         |                      |
| 1  | 0.811           | 10                    | 25.22       | 0.2                   | 7.5    | 30.0    | 56.9 ± 1.8 | 57.1 ± 1.6  | Homogeneous emulsion |
| 2  | 0.811           | 10                    | 25.22       | 0.4                   | 7.5    | 30.0    | 72.9 ± 1.6 | 73.1 ± 1.6  | Homogeneous emulsion |
| 3  | 0.811           | 10                    | 25.22       | 0.6                   | 7.5    | 30.0    | 87.0 ± 1.4 | 86.5 ± 2.0  | Homogeneous emulsion |
| 4  | 0.811           | 10                    | 25.22       | 0.8                   | 7.5    | 30.0    | 94.9 ± 1.1 | 94.4 ± 1.1  | Homogeneous emulsion |
| 5  | 0.811           | 10                    | 25.22       | 1.0                   | 7.5    | 30.0    | 97.0 ± 1.1 | 96.5 ± 1.1  | Homogeneous emulsion |
| 6  | 0.811           | 10                    | 25.22       | 1.2                   | 7.5    | 30.0    | 97.0 ± 1.1 | 96.5 ± 1.1  | Homogeneous emulsion |
| 7  | 0.811           | 10                    | 25.22       | 1.4                   | 7.5    | 30.0    | 96.9 ± 1.0 | 96.3 ± 0.84 | Homogeneous emulsion |

**Table S4.** Effect of HLB<sub>mix</sub>

| HLB  | PGPR,<br>(g)<br>(m <sub>4</sub> ) | Tween 80,<br>(g)<br>(m <sub>5</sub> ) | W1/O<br>(g)<br>(m <sub>6</sub> ) | W2<br>(g)<br>(m <sub>7</sub> ) | SOR<br>(%) | SOWR<br>(%) | EE %       |            | D, nm       | PDI (a.u)     |
|------|-----------------------------------|---------------------------------------|----------------------------------|--------------------------------|------------|-------------|------------|------------|-------------|---------------|
|      |                                   |                                       |                                  |                                |            |             | ADE        | COR        |             |               |
| 8.0  | 2.500                             | 1.786                                 | 10                               | 80.95                          | 30         | 15.0        | 84.8 ± 1.6 | 84.0 ± 1.5 | 438.9 ± 2.8 | 0.328 ± 0.010 |
| 8.5  | 2.321                             | 1.964                                 | 10                               | 80.95                          | 30         | 15.0        | 84.4 ± 1.1 | 83.7 ± 0.9 | 385.9 ± 7.2 | 0.360 ± 0.013 |
| 9.0  | 2.143                             | 2.143                                 | 10                               | 80.95                          | 30         | 15.0        | 85.5 ± 1.0 | 84.9 ± 1.4 | 315.7 ± 6.4 | 0.352 ± 0.021 |
| 9.5  | 1.964                             | 2.321                                 | 10                               | 80.95                          | 30         | 15.0        | 87.2 ± 0.6 | 86.5 ± 0.5 | 273.5 ± 3.9 | 0.276 ± 0.016 |
| 10.0 | 1.786                             | 2.500                                 | 10                               | 80.95                          | 30         | 15.0        | 89.6 ± 1.4 | 88.6 ± 1.4 | 237.5 ± 7.2 | 0.280 ± 0.012 |
| 10.5 | 1.607                             | 2.679                                 | 10                               | 80.95                          | 30         | 15.0        | 89.6 ± 1.2 | 89.0 ± 1.3 | 211.9 ± 3.9 | 0.257 ± 0.010 |
| 11.0 | 1.429                             | 2.857                                 | 10                               | 80.95                          | 30         | 15.0        | 90.1 ± 1.9 | 89.5 ± 1.9 | 188.1 ± 7.8 | 0.253 ± 0.013 |
| 11.5 | 1.250                             | 3.036                                 | 10                               | 80.95                          | 30         | 15.0        | 91.4 ± 1.4 | 90.6 ± 1.4 | 150.8 ± 4.7 | 0.252 ± 0.015 |
| 12.0 | 1.071                             | 3.214                                 | 10                               | 80.95                          | 30         | 15.0        | 92.0 ± 0.6 | 91.1 ± 0.5 | 133.0 ± 3.6 | 0.226 ± 0.011 |
| 12.5 | 0.893                             | 3.393                                 | 10                               | 80.95                          | 30         | 15.0        | 92.3 ± 1.0 | 91.4 ± 1.0 | 181.6 ± 5.3 | 0.347 ± 0.017 |
| 13.0 | 0.714                             | 3.571                                 | 10                               | 80.95                          | 30         | 15.0        | 91.3 ± 0.6 | 90.4 ± 0.4 | 554.7 ± 8.4 | 0.367 ± 0.033 |
| 13.5 | 0.536                             | 3.750                                 | 10                               | 80.95                          | 30         | 15.0        | -          | -          | -           | -             |
| 14.0 | 0.357                             | 3.929                                 | 10                               | 80.95                          | 30         | 15.0        | -          | -          | -           | -             |
| 14.5 | 0.179                             | 4.107                                 | 10                               | 80.95                          | 30         | 15.0        | -          | -          | -           | -             |
| 15.0 | 0                                 | 4.286                                 | 10                               | 80.95                          | 30         | 15.0        | -          | -          | -           | -             |

**Table S5.** Effect of SOR

| PGPR, (g)<br>(m4) | Tween 80,<br>(g)<br>(m5) | W1/O<br>(g)<br>(m6) | W2<br>(g)<br>(m7) | SOR<br>(%) | SOWR<br>(%) | EE %        |             | D (nm)      | PDI (a.u)            | Visual<br>appearance |
|-------------------|--------------------------|---------------------|-------------------|------------|-------------|-------------|-------------|-------------|----------------------|----------------------|
|                   |                          |                     |                   |            |             | ADE         | COR         |             |                      |                      |
| 0.278             | 0.833                    | 10                  | 63.0              | 10         | 15.0        | -           | -           | -           | Homogeneous emulsion | Separated            |
| 0.441             | 1.324                    | 10                  | 66.5              | 15         | 15.0        | -           | -           | -           | -                    | Separated            |
| 0.625             | 1.875                    | 10                  | 71.0              | 20         | 15.0        | 92.0 ± 1.0  | 91.6 ± 1.1  | 116.7 ± 2.3 | 0.208 ± 0.009        | Homogeneous emulsion |
| 0.833             | 2.50                     | 10                  | 75.5              | 25         | 15.0        | 92.4 ± 1.1  | 91.8 ± 1.3  | 125.7 ± 2.0 | 0.208 ± 0.020        | Homogeneous emulsion |
| 1.071             | 3.214                    | 10                  | 81.0              | 30         | 15.0        | 92.0 ± 0.63 | 91.1 ± 0.52 | 133.0 ± 3.6 | 0.226 ± 0.011        | Homogeneous emulsion |

**Table S6.** Effect of SOWR

| PGPR, (g)<br>(m4) | Tween<br>80, (g)<br>(m5) | W1/O<br>(g)<br>(m6) | W2<br>(g)<br>(m7) | SOR<br>(%) | SOWR<br>(%) | EE %        |             | D (nm)      | PDI (a.u)     | Visual<br>appearance |
|-------------------|--------------------------|---------------------|-------------------|------------|-------------|-------------|-------------|-------------|---------------|----------------------|
|                   |                          |                     |                   |            |             | ADE         | COR         |             |               |                      |
| 0.625             | 1.875                    | 10                  | 71.0              | 20         | 15.0        | 92.0± 1.0   | 91.6 ± 1.1  | 116.7 ± 2.3 | 0.208 ± 0.009 | Homogeneous emulsion |
| 0.625             | 1.875                    | 10                  | 50.0              | 20         | 20.0        | 92.8 ± 0.54 | 92.3 ± 0.45 | 118.9 ± 2.0 | 0.200 ± 0.006 | Homogeneous emulsion |
| 0.625             | 1.875                    | 10                  | 37.5              | 20         | 25.0        | -           | -           | -           | -             | Separated            |
| 0.625             | 1.875                    | 10                  | 29.2              | 20         | 30.0        | -           | -           | -           | -             | Separated            |

Data File C:\CHEM32\1\DATA\TONG HOP SO LIEU 1\001-0901.D  
Sample Name: TN 9.1

```
=====
Acq. Operator   : Nguyen Thanh Tan           Seq. Line :    9
Acq. Instrument : Instrument 1                Location  : Vial 1
Injection Date  : 1/24/2024 10:46:56 AM      Inj       :    1
Inj Volume     : 25 µl
Acq. Method    : D:\DATA\ADENOSINE-CORDYCEPIN.M
Last changed   : 1/24/2024 8:37:42 AM by Nguyen Thanh Tan
Analysis Method: C:\CHEM32\1\METHODS\DEF_GC.M
Additional Info : Peak(s) manually integrated
=====
```

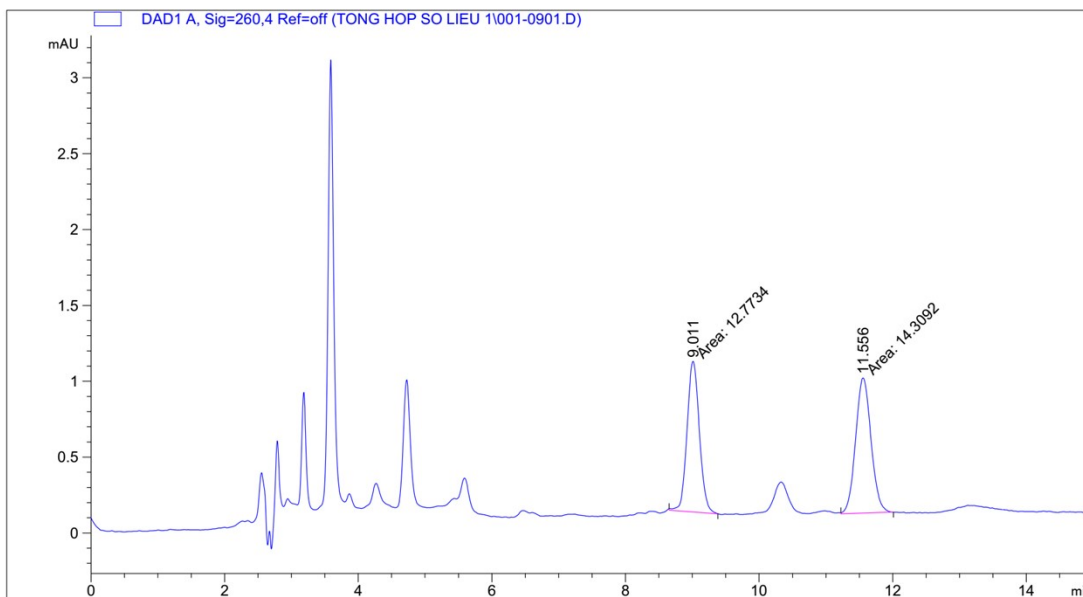

=====  
Area Percent Report  
=====

Sorted By : Signal  
Multiplier: : 1.0000  
Dilution: : 1.0000  
Use Multiplier & Dilution Factor with ISTDs

Signal 1: DAD1 A, Sig=260,4 Ref=off

| Peak # | RetTime [min] | Type | Width [min] | Area [mAU*s] | Height [mAU] | Area %   |
|--------|---------------|------|-------------|--------------|--------------|----------|
| 1      | 9.011         | MM   | 0.2143      | 12.77337     | 9.93557e-1   | 47.16457 |
| 2      | 11.556        | MM   | 0.2674      | 14.30918     | 8.91802e-1   | 52.83543 |

Totals : 27.08255 1.88536

=====  
\*\*\* End of Report \*\*\*

**Figure S1:** Chromatogram of emulsifier content analysis at SWR 7.5% (first measurement).

Data File C:\CHEM32\1\DATA\TONG HOP SO LIEU 1\002-1601.D  
Sample Name: TN 10.1

```
=====
Acq. Operator   : Nguyen Thanh Tan           Seq. Line :   16
Acq. Instrument : Instrument 1                Location  : Vial 2
Injection Date  : 1/24/2024 11:59:21 AM      Inj       :    1
Inj Volume     : 25 µl
Acq. Method    : D:\DATA\ADENOSINE-CORDYCEPIN.M
Last changed   : 1/24/2024 8:37:42 AM by Nguyen Thanh Tan
Analysis Method: C:\CHEM32\1\METHODS\DEF_GC.M
Additional Info : Peak(s) manually integrated
=====
```

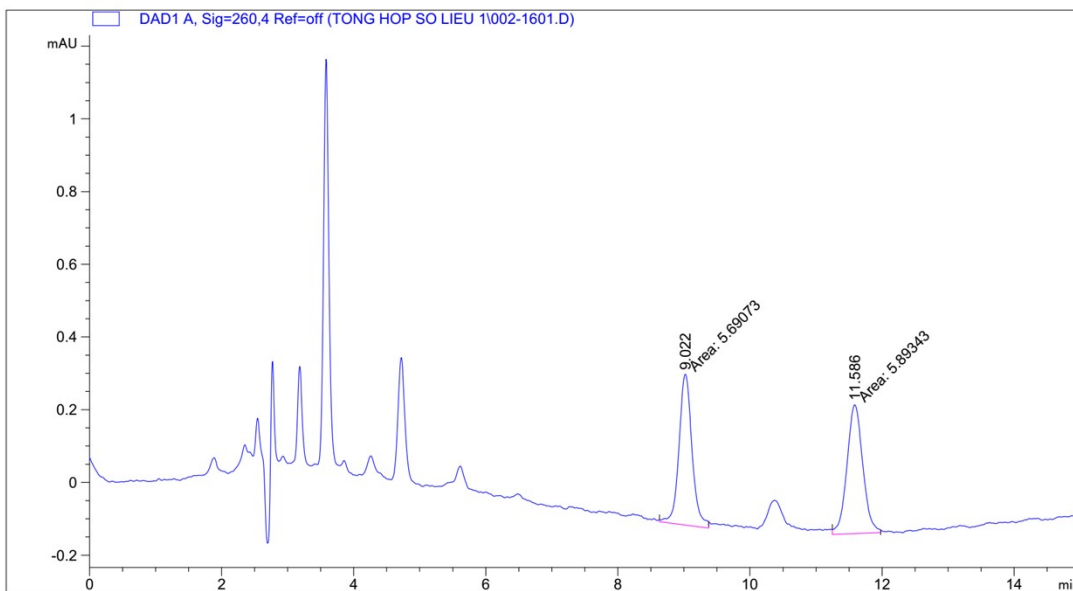

```
=====
                          Area Percent Report
=====
```

```
Sorted By      :      Signal
Multiplier:    :      1.0000
Dilution:      :      1.0000
Use Multiplier & Dilution Factor with ISTDs
```

Signal 1: DAD1 A, Sig=260,4 Ref=off

| Peak # | RetTime [min] | Type | Width [min] | Area [mAU*s] | Height [mAU] | Area %   |
|--------|---------------|------|-------------|--------------|--------------|----------|
| 1      | 9.022         | MM   | 0.2285      | 5.69073      | 4.15029e-1   | 49.12508 |
| 2      | 11.586        | MM   | 0.2776      | 5.89343      | 3.53886e-1   | 50.87492 |

Totals :                    11.58416 7.68915e-1

```
=====
*** End of Report ***
=====
```

**Figure S2:** Chromatogram of *Cordyceps militaris* dry extract solution content in the oil phase at SWOR 40% (first measurement).

Data File C:\CHEM32\1\DATA\TONG HOP SO LIEU 1\004-4701.D  
Sample Name: TN 12.1

```
=====
Acq. Operator   : Nguyen Thanh Tan          Seq. Line : 47
Acq. Instrument : Instrument 1              Location  : Vial 4
Injection Date  : 1/24/2024 2:57:01 PM      Inj       : 1
Inj Volume     : 25 µl
Acq. Method    : D:\DATA\ADENOSINE-CORDYCEPIN.M
Last changed   : 1/24/2024 8:37:42 AM by Nguyen Thanh Tan
Analysis Method: C:\CHEM32\1\METHODS\DEF_GC.M
Additional Info : Peak(s) manually integrated
=====
```

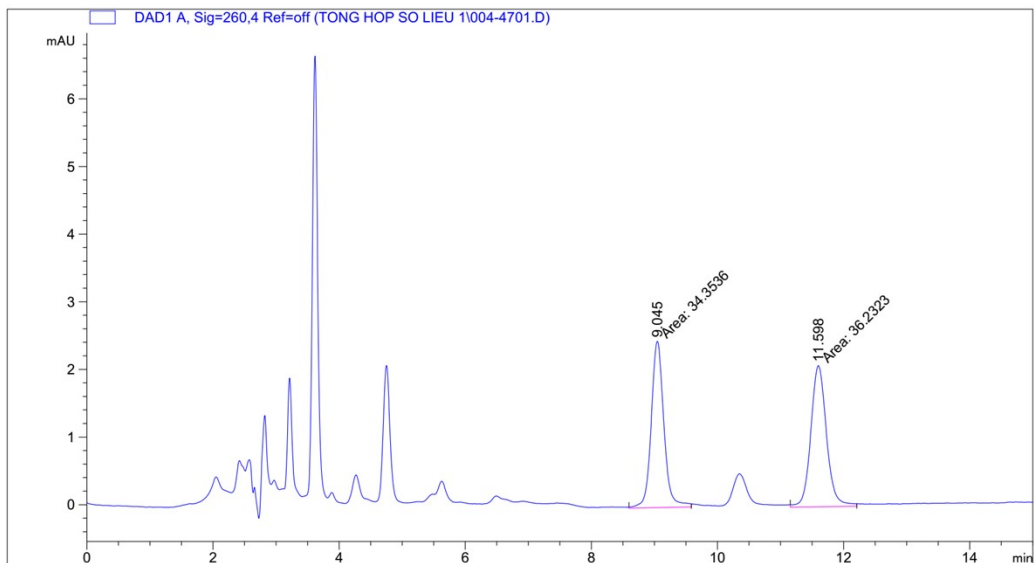

=====  
Area Percent Report  
=====

Sorted By : Signal  
Multiplier: : 1.0000  
Dilution: : 1.0000  
Use Multiplier & Dilution Factor with ISTDs

Signal 1: DAD1 A, Sig=260,4 Ref=off

| Peak # | RetTime [min] | Type | Width [min] | Area [mAU*s] | Height [mAU] | Area %   |
|--------|---------------|------|-------------|--------------|--------------|----------|
| 1      | 9.045         | MM   | 0.2328      | 34.35364     | 2.45970      | 48.66926 |
| 2      | 11.598        | MM   | 0.2891      | 36.23227     | 2.08893      | 51.33074 |

Totals : 70.58590 4.54864

=====  
\*\*\* End of Report \*\*\*

**Figure S3:** Chromatogram evaluating the effect of refined palm oil (acid value 0.16 mg KOH/g) on the W1/O emulsion (first measurement).

Data File C:\CHEM32\1\DATA\TONG HOP SO LIEU 1\011-0201.D  
Sample Name: TN 14.1

```
=====
Acq. Operator   : Nguyen Thanh Tan           Seq. Line :    2
Acq. Instrument : Instrument 1                Location  : Vial 11
Injection Date  : 1/25/2024 1:04:11 PM        Inj       :    1
Inj Volume     : 25 µl
Acq. Method    : D:\DATA\ADENOSINE-CORDYCEPIN.M
Last changed   : 1/24/2024 8:37:42 PM by Nguyen Thanh Tan
Analysis Method: C:\CHEM32\1\METHODS\DEF_GC.M
Additional Info : Peak(s) manually integrated
=====
```

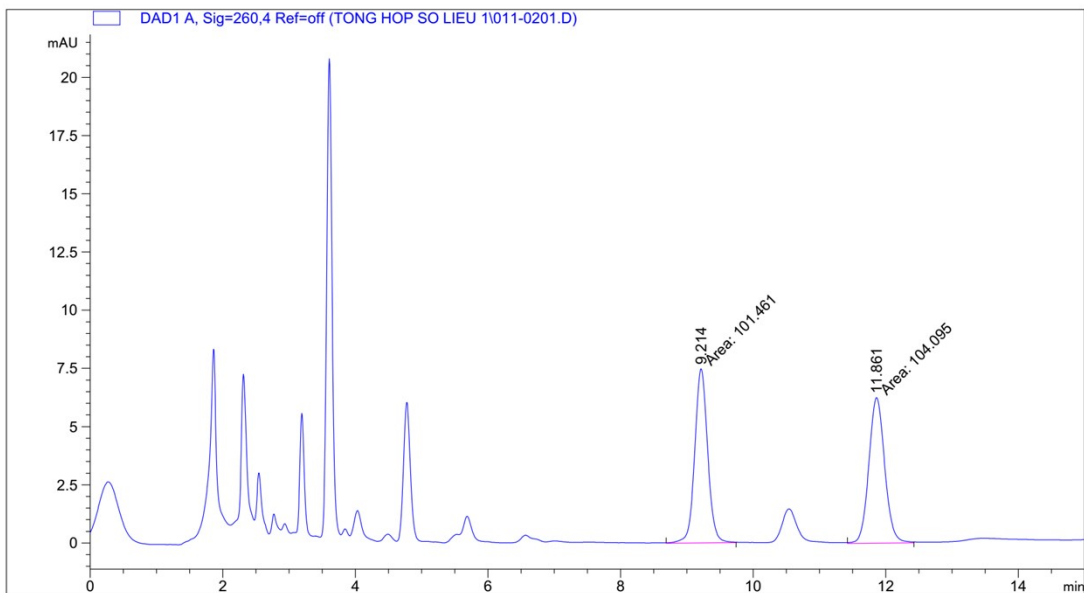

=====  
Area Percent Report  
=====

Sorted By : Signal  
Multiplier: : 1.0000  
Dilution: : 1.0000  
Use Multiplier & Dilution Factor with ISTDs

Signal 1: DAD1 A, Sig=260,4 Ref=off

| Peak # | RetTime [min] | Type | Width [min] | Area [mAU*s] | Height [mAU] | Area %   |
|--------|---------------|------|-------------|--------------|--------------|----------|
| 1      | 9.214         | MM   | 0.2259      | 101.46100    | 7.48480      | 49.35933 |
| 2      | 11.861        | MM   | 0.2774      | 104.09489    | 6.25460      | 50.64067 |

Totals : 205.55589 13.73941

=====  
\*\*\* End of Report \*\*\*

**Figure S4:** Chromatogram evaluating the effect of crude oil (acid value 2.96 mg KOH/g) on the W1/O emulsion (first measurement).

Data File C:\CHEM32\1\DATA\TONG HOP SO LIEU 1\001-0101.D  
Sample Name: TN 20.1

```
=====
Acq. Operator   : Nguyen Thanh Tan          Seq. Line :    1
Acq. Instrument : Instrument 1              Location  : Vial 1
Injection Date  : 1/27/2024 8:00:24 AM      Inj       :    1
Inj Volume     : 25 µl
Acq. Method    : D:\DATA\ADENOSINE-CORDYCEPIN.M
Last changed   : 1/24/2024 8:37:42 AM by Nguyen Thanh Tan
Analysis Method: C:\CHEM32\1\METHODS\DEF_GC.M
Additional Info : Peak(s) manually integrated
=====
```

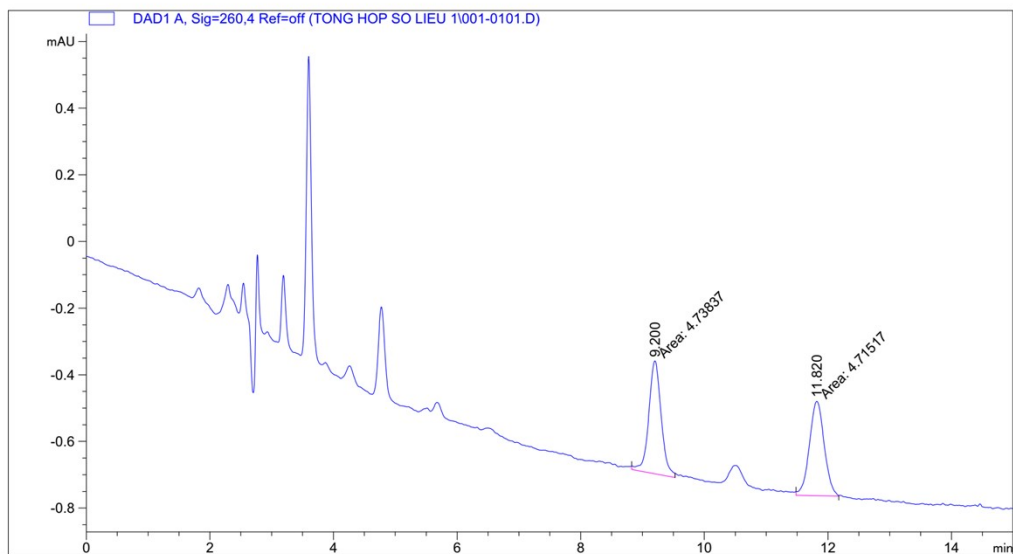

=====  
Area Percent Report  
=====

Sorted By : Signal  
Multiplier: : 1.0000  
Dilution: : 1.0000  
Use Multiplier & Dilution Factor with ISTDs

Signal 1: DAD1 A, Sig=260,4 Ref=off

| Peak # | RetTime [min] | Type | Width [min] | Area [mAU*s] | Height [mAU] | Area %   |
|--------|---------------|------|-------------|--------------|--------------|----------|
| 1      | 9.200         | MM   | 0.2327      | 4.73837      | 3.39337e-1   | 50.12273 |
| 2      | 11.820        | MM   | 0.2776      | 4.71517      | 2.83047e-1   | 49.87727 |

Totals : 9.45354 6.22383e-1

=====  
\*\*\* End of Report \*\*\*

**Figure S5:** Chromatogram evaluating the effect of CaCl<sub>2</sub> at 1% (first measurement).

Data File C:\CHEM32\1\DATA\TONG HOP SO LIEU 1\002-0901.D  
Sample Name: TN 32.1

```
=====
Acq. Operator   : Nguyen Thanh Tan           Seq. Line :    9
Acq. Instrument : Instrument 1               Location  : Vial 2
Injection Date  : 2/5/2024 10:07:47 AM       Inj       :    1
Inj Volume     : 25 µl
Acq. Method    : D:\DATA\ADENOSINE-CORDYCEPIN.M
Last changed   : 1/24/2024 8:37:42 AM by Nguyen Thanh Tan
Analysis Method: C:\CHEM32\1\METHODS\DEF_GC.M
Additional Info : Peak(s) manually integrated
=====
```

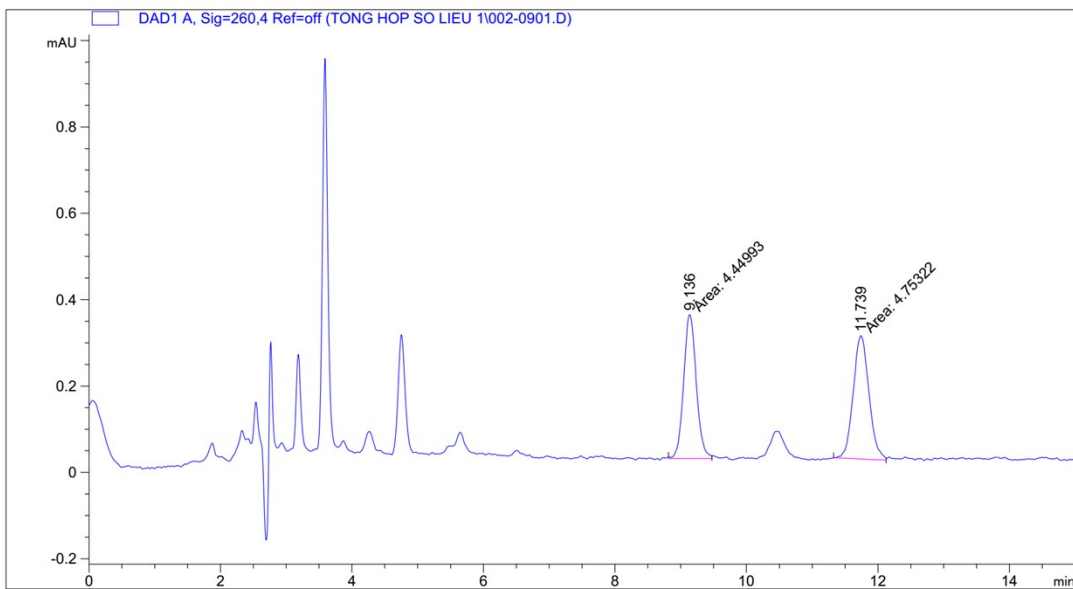

=====  
Area Percent Report  
=====

Sorted By : Signal  
Multiplier: : 1.0000  
Dilution: : 1.0000  
Use Multiplier & Dilution Factor with ISTDs

Signal 1: DAD1 A, Sig=260,4 Ref=off

| Peak # | RetTime [min] | Type | Width [min] | Area [mAU*s] | Height [mAU] | Area %   |
|--------|---------------|------|-------------|--------------|--------------|----------|
| 1      | 9.136         | MM   | 0.2225      | 4.44993      | 3.33394e-1   | 48.35226 |
| 2      | 11.739        | MM   | 0.2774      | 4.75322      | 2.85593e-1   | 51.64774 |

Totals : 9.20314 6.18987e-1

=====  
\*\*\* End of Report \*\*\*

**Figure S6:** Chromatogram evaluating the effect of HLB value 12 on the double nanoemulsion system (first measurement).

Data File C:\CHEM32\1\DATA\TONG HOP SO LIEU 1\001-0401.D  
Sample Name: TN 45.1

```
=====
Acq. Operator   : Nguyen Thanh Tan          Seq. Line :    4
Acq. Instrument : Instrument 1              Location  : Vial 1
Injection Date  : 2/25/2024 11:58:09 AM     Inj       :    1
Inj Volume     : 25 µl
Acq. Method    : D:\DATA\ADENOSINE-CORDYCEPIN.M
Last changed   : 1/24/2024 8:37:42 AM by Nguyen Thanh Tan
Analysis Method: C:\CHEM32\1\METHODS\DEF_GC.M
Additional Info : Peak(s) manually integrated
=====
```

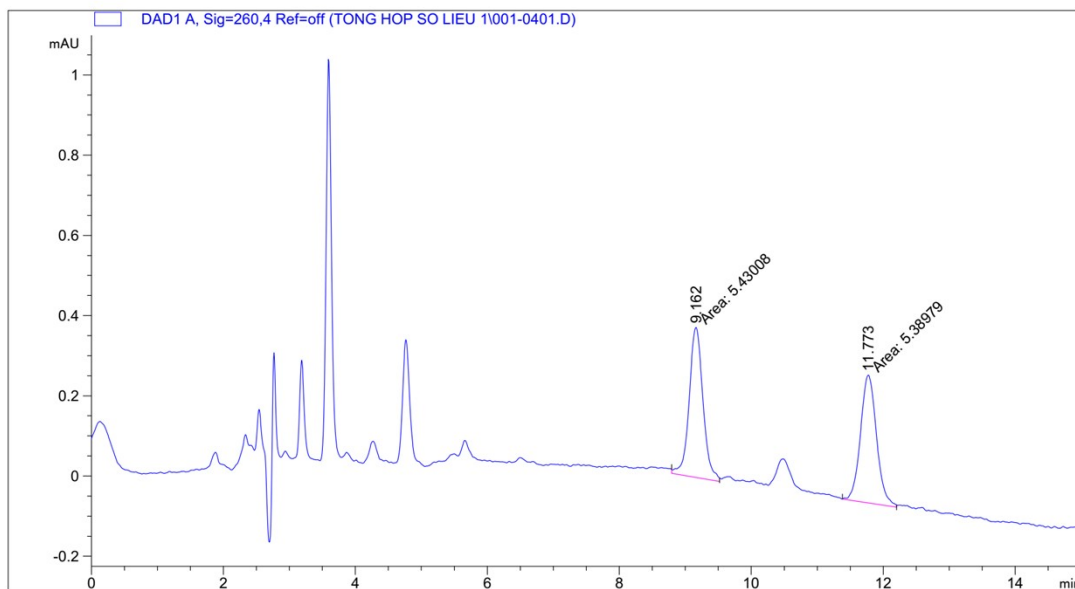

=====  
Area Percent Report  
=====

Sorted By : Signal  
Multiplier: : 1.0000  
Dilution: : 1.0000  
Use Multiplier & Dilution Factor with ISTDs

Signal 1: DAD1 A, Sig=260,4 Ref=off

| Peak # | RetTime [min] | Type | Width [min] | Area [mAU*s] | Height [mAU] | Area %   |
|--------|---------------|------|-------------|--------------|--------------|----------|
| 1      | 9.162         | MM   | 0.2420      | 5.43008      | 3.74005e-1   | 50.18618 |
| 2      | 11.773        | MM   | 0.2819      | 5.38979      | 3.18680e-1   | 49.81382 |

Totals : 10.81988 6.92685e-1

=====  
\*\*\* End of Report \*\*\*

**Figure S7:** Chromatogram evaluating the effect of emulsifier content at SOR 20% on the double nanoemulsion system (first measurement).

Data File C:\CHEM32\1\DATA\TONG HOP SO LIEU 1\001-0201.D  
Sample Name: TN 52.1

```
=====
Acq. Operator   : Nguyen Thanh Tan           Seq. Line :    2
Acq. Instrument : Instrument 1               Location  : Vial 1
Injection Date  : 2/27/2024 12:33:06 AM      Inj       :    1
Inj Volume     : 25 µl
Acq. Method    : D:\DATA\ADENOSINE-CORDYCEPIN.M
Last changed   : 1/24/2024 8:37:42 AM by Nguyen Thanh Tan
Analysis Method : C:\CHEM32\1\METHODS\DEF_GC.M
Additional Info : Peak(s) manually integrated
=====
```

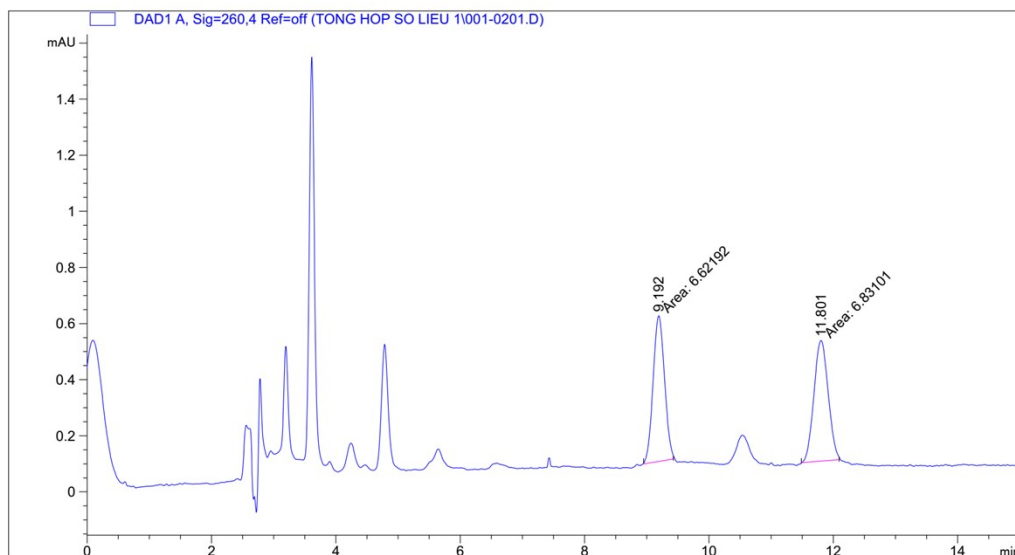

```
=====
                          Area Percent Report
=====
```

```
Sorted By      :      Signal
Multiplier:    :      1.0000
Dilution:      :      1.0000
Use Multiplier & Dilution Factor with ISTDs
```

Signal 1: DAD1 A, Sig=260,4 Ref=off

| Peak # | RetTime [min] | Type | Width [min] | Area [mAU*s] | Height [mAU] | Area %   |
|--------|---------------|------|-------------|--------------|--------------|----------|
| 1      | 9.192         | MM   | 0.2123      | 6.62192      | 5.19801e-1   | 49.22288 |
| 2      | 11.801        | MM   | 0.2646      | 6.83101      | 4.30284e-1   | 50.77712 |

Totals : 13.45292 9.50086e-1

```
=====
*** End of Report ***
```

**Figure S8:** Chromatogram evaluating the effect of primary emulsion content in the aqueous phase at SOWR 20% on the double nanoemulsion system (first measurement).

Data File C:\CHEM32\1\DATA\TONG HOP SO LIEU 1\001-0801.D  
Sample Name: TN 59.1

```
=====
Acq. Operator   : Nguyen Thanh Tan           Seq. Line :    8
Acq. Instrument : Instrument 1               Location : Vial 1
Injection Date  : 2/28/2024 9:51:51 AM      Inj       :    1
Inj Volume     : 25 µl
Acq. Method     : D:\DATA\ADENOSINE-CORDYCEPIN.M
Last changed    : 1/24/2024 8:37:42 AM by Nguyen Thanh Tan
Analysis Method : C:\CHEM32\1\METHODS\DEF_GC.M
Additional Info  : Peak(s) manually integrated
=====
```

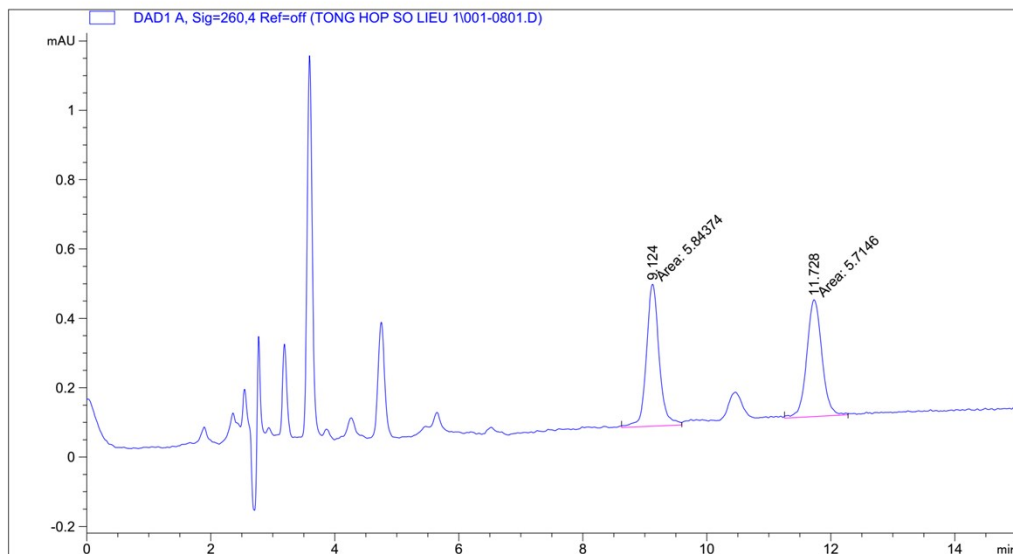

=====  
Area Percent Report  
=====

Sorted By : Signal  
Multiplier: : 1.0000  
Dilution: : 1.0000  
Use Multiplier & Dilution Factor with ISTDs

Signal 1: DAD1 A, Sig=260,4 Ref=off

| Peak # | RetTime [min] | Type | Width [min] | Area [mAU*s] | Height [mAU] | Area %   |
|--------|---------------|------|-------------|--------------|--------------|----------|
| 1      | 9.124         | MM   | 0.2378      | 5.84374      | 4.09601e-1   | 50.55861 |
| 2      | 11.728        | MM   | 0.2830      | 5.71460      | 3.36547e-1   | 49.44139 |

Totals : 11.55834 7.46148e-1

=====  
\*\*\* End of Report \*\*\*

**Figure S9:** Chromatogram evaluating the effect of ultrasonic power (350 W) on the double nanoemulsion system (first measurement).

Data File C:\CHEM32\1\DATA\TONG HOP SO LIEU 1\001-0201.D  
Sample Name: TN 66.1

```
=====
Acq. Operator   : Nguyen Thanh Tan          Seq. Line :    2
Acq. Instrument : Instrument 1              Location  : Vial 1
Injection Date  : 2/29/2024 12:33:06 AM     Inj       :    1
Inj Volume     : 25 µl
Acq. Method     : D:\DATA\ADENOSINE-CORDYCEPIN.M
Last changed    : 1/24/2024 8:37:42 AM by Nguyen Thanh Tan
Analysis Method : C:\CHEM32\1\METHODS\DEF_GC.M
Additional Info  : Peak(s) manually integrated
=====
```

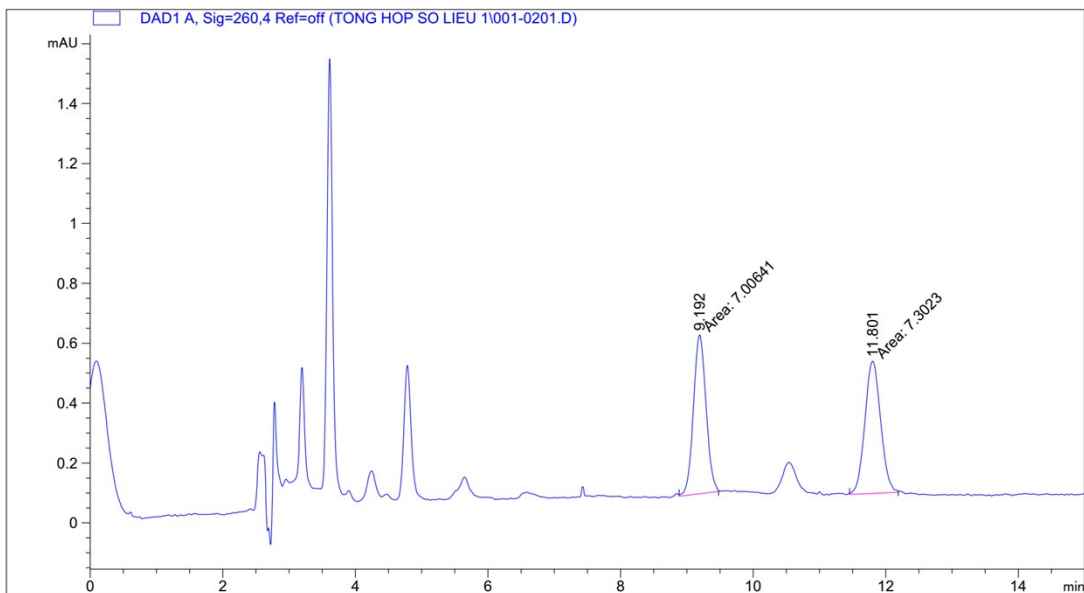

=====  
Area Percent Report  
=====

Sorted By : Signal  
Multiplier: : 1.0000  
Dilution: : 1.0000  
Use Multiplier & Dilution Factor with ISTDs

Signal 1: DAD1 A, Sig=260,4 Ref=off

| Peak # | RetTime [min] | Type | Width [min] | Area [mAU*s] | Height [mAU] | Area %   |
|--------|---------------|------|-------------|--------------|--------------|----------|
| 1      | 9.192         | MM   | 0.2199      | 7.00641      | 5.30946e-1   | 48.96604 |
| 2      | 11.801        | MM   | 0.2757      | 7.30230      | 4.41436e-1   | 51.03396 |

Totals : 14.30871 9.72382e-1

=====  
\*\*\* End of Report \*\*\*

**Figure S10:** Chromatogram evaluating the effect of ultrasonication time (6 minutes) on the double nanoemulsion system (first measurement).

## SZ-100

HLB 12.1.nsz

### Measurement Results

|                                     |                              |
|-------------------------------------|------------------------------|
| Date                                | : February 6, 2024           |
| Measurement Type                    | : Particle Size              |
| Sample Name                         | : HLB 12.1                   |
| Scattering Angle                    | : 173                        |
| Temperature of the Holder           | : 25.0 °C                    |
| Dispersion Medium Viscosity         | : 0.897 mPa·s                |
| Transmission Intensity before Meas. | : 28403                      |
| Distribution Form                   | : Standard                   |
| Distribution Form(Dispersity)       | : Monodisperse               |
| Representation of Result            | : Scattering Light Intensity |
| Count Rate                          | : 1161 kCPS                  |

### Calculation Results

| Peak No. | S.P.Area Ratio | Mean     | S. D.   | Mode     |
|----------|----------------|----------|---------|----------|
| 1        | 1.00           | 166.0 nm | 43.7 nm | 160.4 nm |
| 2        | ---            | --- nm   | --- nm  | --- nm   |
| 3        | ---            | --- nm   | --- nm  | --- nm   |
| Total    | 1.00           | 166.0 nm | 43.7 nm | 160.4 nm |

### Cumulant Operations

|           |            |
|-----------|------------|
| Z-Average | : 132.7 nm |
| PI        | : 0.226    |

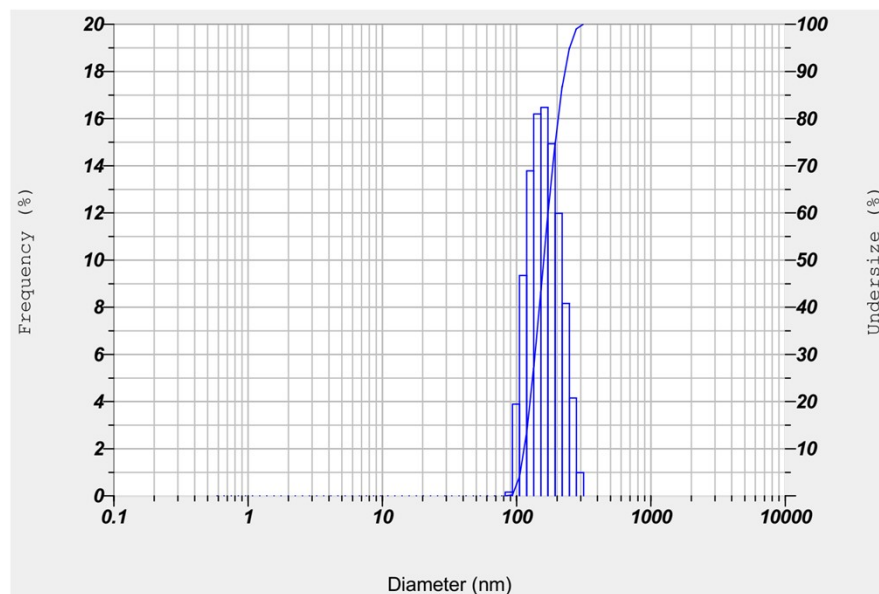

**Figure S11:** Particle size of the double nanoemulsion system at HLB value 12 measured by DLS (first measurement).

## SZ-100

SOR 20.1.nsz

### Measurement Results

|                                     |                              |
|-------------------------------------|------------------------------|
| Date                                | : February 25, 2024          |
| Measurement Type                    | : Particle Size              |
| Sample Name                         | : SOR 20.1                   |
| Scattering Angle                    | : 173                        |
| Temperature of the Holder           | : 24.9 °C                    |
| Dispersion Medium Viscosity         | : 0.897 mPa·s                |
| Transmission Intensity before Meas. | : 29416                      |
| Distribution Form                   | : Standard                   |
| Distribution Form(Dispersity)       | : Monodisperse               |
| Representation of Result            | : Scattering Light Intensity |
| Count Rate                          | : 1816 kCPS                  |

### Calculation Results

| Peak No. | S.P.Area Ratio | Mean     | S. D.   | Mode     |
|----------|----------------|----------|---------|----------|
| 1        | 1.00           | 122.8 nm | 35.3 nm | 111.8 nm |
| 2        | ---            | --- nm   | --- nm  | --- nm   |
| 3        | ---            | --- nm   | --- nm  | --- nm   |
| Total    | 1.00           | 122.8 nm | 35.3 nm | 111.8 nm |

### Cumulant Operations

|           |            |
|-----------|------------|
| Z-Average | : 117.2 nm |
| PI        | : 0.216    |

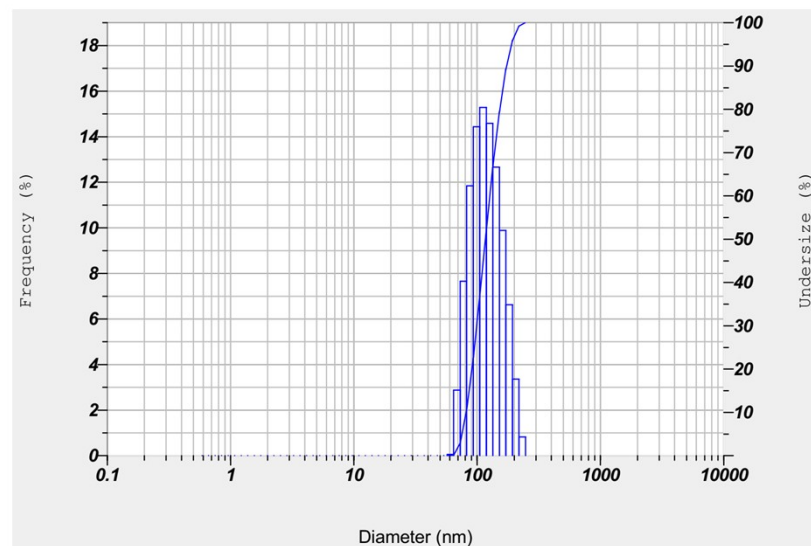

**Figure S12:** Particle size of the double nanoemulsion system at SOR 20% measured by DLS (first measurement).

## SZ-100

SOWR 20.1.nsz

### Measurement Results

|                                     |                              |
|-------------------------------------|------------------------------|
| Date                                | : February 26, 2024          |
| Measurement Type                    | : Particle Size              |
| Sample Name                         | : SOWR 20.1                  |
| Scattering Angle                    | : 173                        |
| Temperature of the Holder           | : 24.9 °C                    |
| Dispersion Medium Viscosity         | : 0.897 mPa·s                |
| Transmission Intensity before Meas. | : 29416                      |
| Distribution Form                   | : Standard                   |
| Distribution Form(Dispersity)       | : Monodisperse               |
| Representation of Result            | : Scattering Light Intensity |
| Count Rate                          | : 1816 kCPS                  |

### Calculation Results

| Peak No. | S.P.Area Ratio | Mean     | S. D.   | Mode     |
|----------|----------------|----------|---------|----------|
| 1        | 1.00           | 126.8 nm | 36.6 nm | 112.2 nm |
| 2        | ---            | --- nm   | --- nm  | --- nm   |
| 3        | ---            | --- nm   | --- nm  | --- nm   |
| Total    | 1.00           | 126.8 nm | 36.6 nm | 112.2 nm |

### Cumulant Operations

|           |            |
|-----------|------------|
| Z-Average | : 121.2 nm |
| PI        | : 0.199    |

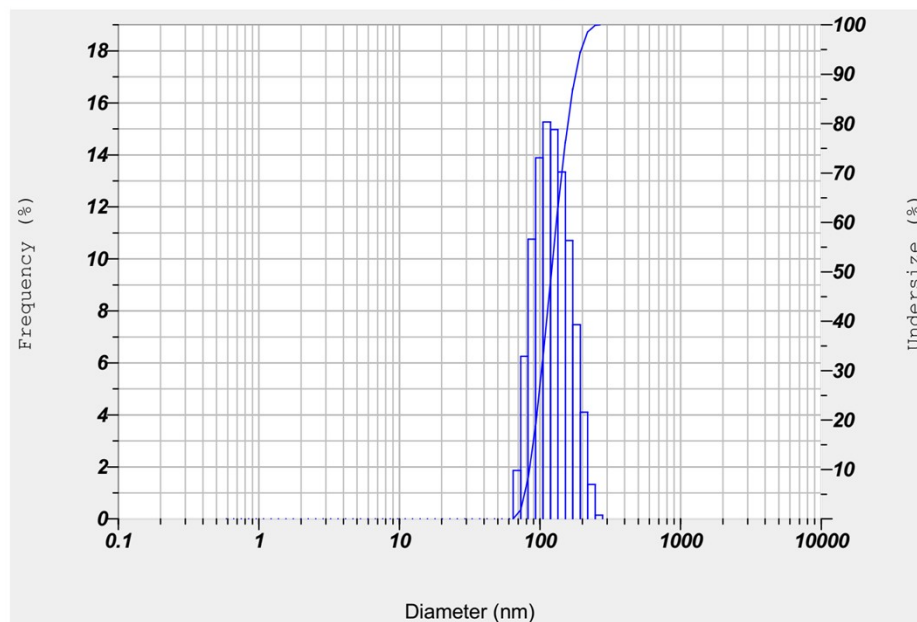

**Figure S13:** Particle size of the double nanoemulsion system at SOWR 20% measured by DLS (first measurement).

## SZ-100

PU 350W.1.nsz

### Measurement Results

|                                     |                              |
|-------------------------------------|------------------------------|
| Date                                | : February 29, 2024          |
| Measurement Type                    | : Particle Size              |
| Sample Name                         | : PU 350W.1                  |
| Scattering Angle                    | : 173                        |
| Temperature of the Holder           | : 25.0 °C                    |
| Dispersion Medium Viscosity         | : 0.897 mPa·s                |
| Transmission Intensity before Meas. | : 28780                      |
| Distribution Form                   | : Standard                   |
| Distribution Form(Dispersity)       | : Monodisperse               |
| Representation of Result            | : Scattering Light Intensity |
| Count Rate                          | : 2337 kCPS                  |

### Calculation Results

| Peak No. | S.P.Area Ratio | Mean     | S. D.   | Mode    |
|----------|----------------|----------|---------|---------|
| 1        | 1.00           | 104.2 nm | 28.3 nm | 98.6 nm |
| 2        | ---            | --- nm   | --- nm  | --- nm  |
| 3        | ---            | --- nm   | --- nm  | --- nm  |
| Total    | 1.00           | 104.2 nm | 28.3 nm | 98.6 nm |

### Cumulant Operations

|           |            |
|-----------|------------|
| Z-Average | : 101.1 nm |
| PI        | : 0.188    |

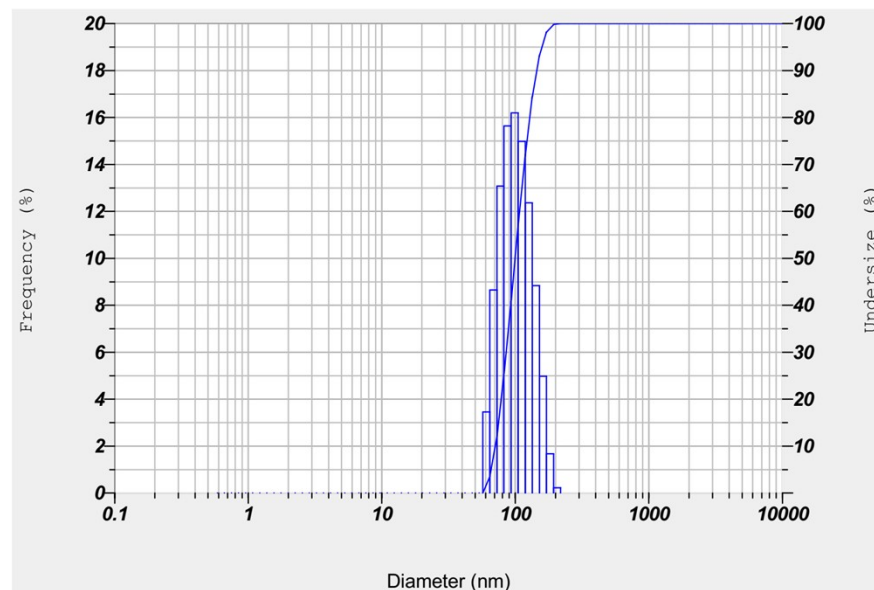

**Figure S14:** Particle size of the double nanoemulsion system at ultrasonic power 350 W measured by DLS (first measurement).

## SZ-100

TU 6.1.nsz

### Measurement Results

|                                     |                              |
|-------------------------------------|------------------------------|
| Date                                | : February 29, 2024          |
| Measurement Type                    | : Particle Size              |
| Sample Name                         | : TU 6.1                     |
| Scattering Angle                    | : 173                        |
| Temperature of the Holder           | : 25.0 °C                    |
| Dispersion Medium Viscosity         | : 0.897 mPa·s                |
| Transmission Intensity before Meas. | : 28780                      |
| Distribution Form                   | : Standard                   |
| Distribution Form(Dispersity)       | : Monodisperse               |
| Representation of Result            | : Scattering Light Intensity |
| Count Rate                          | : 2419 kCPS                  |

### Calculation Results

| Peak No. | S.P.Area Ratio | Mean     | S. D.   | Mode    |
|----------|----------------|----------|---------|---------|
| 1        | 1.00           | 104.9 nm | 28.6 nm | 98.7 nm |
| 2        | ---            | --- nm   | --- nm  | --- nm  |
| 3        | ---            | --- nm   | --- nm  | --- nm  |
| Total    | 1.00           | 104.9 nm | 28.6 nm | 98.7 nm |

### Cumulant Operations

|           |           |
|-----------|-----------|
| Z-Average | : 99.4 nm |
| PI        | : 0.186   |

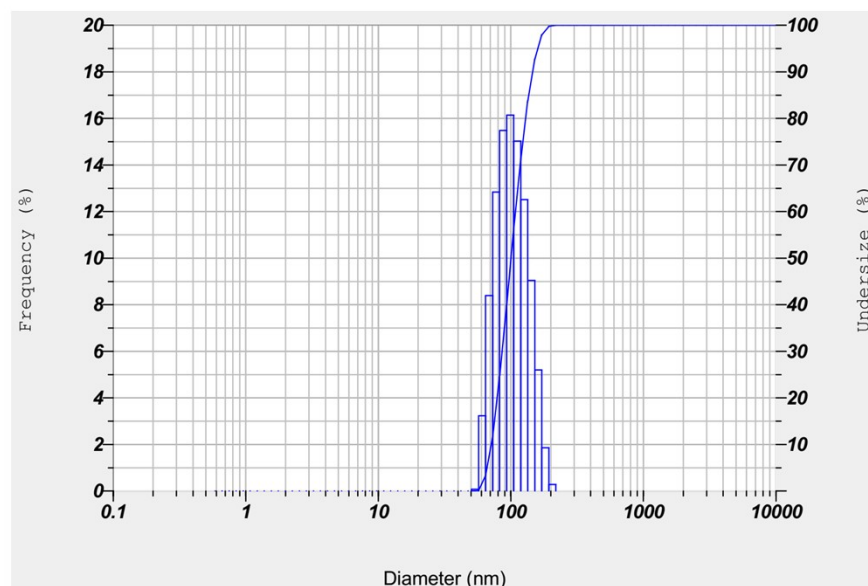

**Figure S15:** Particle size of the double nanoemulsion system at ultrasonication time (6 minutes) measured by DLS (first measurement).

## Measurement Results

**Nano NCMs.1.nzt**

### Measurement Results

Date : March 3, 2024  
Measurement Type : Zeta Potential  
Sample Name : Nano NCMs.1  
Temperature of the Holder : 25.0 °C  
Dispersion Medium Viscosity : 0.945 mPa·s  
Conductivity : 0.149 mS/cm  
Electrode Voltage : 3.3 V

### Calculation Results

| Peak No. | Zeta Potential | Electrophoretic Mobility      |
|----------|----------------|-------------------------------|
| 1        | -70.0 mV       | -0.000541 cm <sup>2</sup> /Vs |
| 2        | --- mV         | --- cm <sup>2</sup> /Vs       |
| 3        | --- mV         | --- cm <sup>2</sup> /Vs       |

Zeta Potential (Mean) : -70.0 mV  
Electrophoretic Mobility Mean : -0.000541 cm<sup>2</sup>/Vs

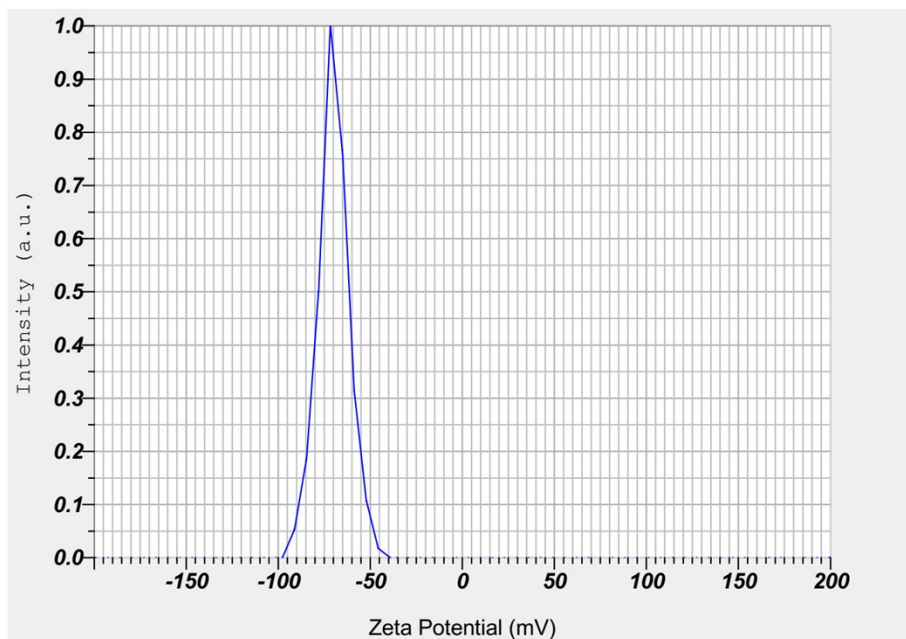

**Figure S16:** Zeta potential of the NCMs double nanoemulsion system (first measurement).

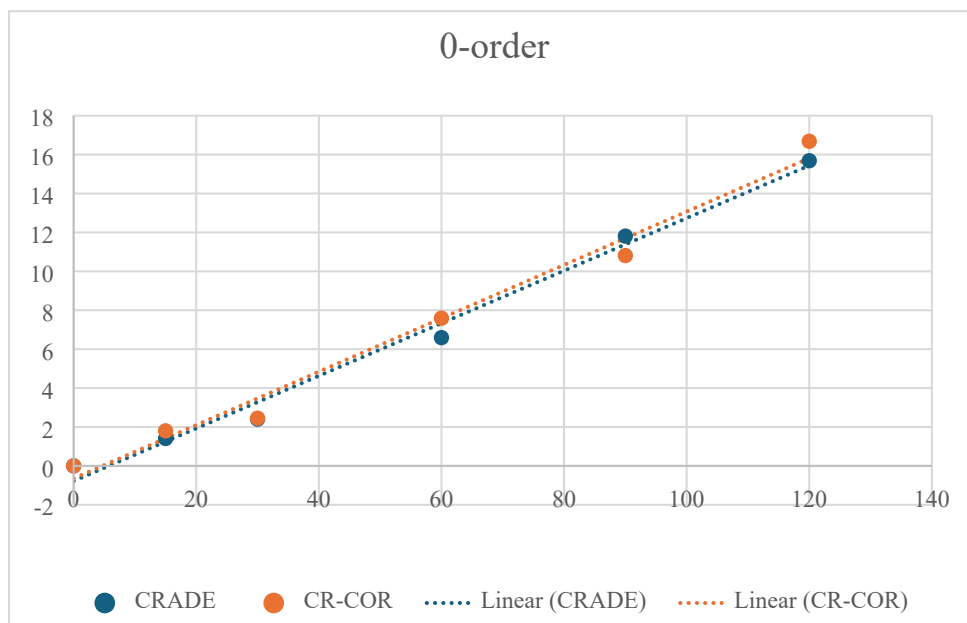

**Figure S17.** Zero- order model in SGF

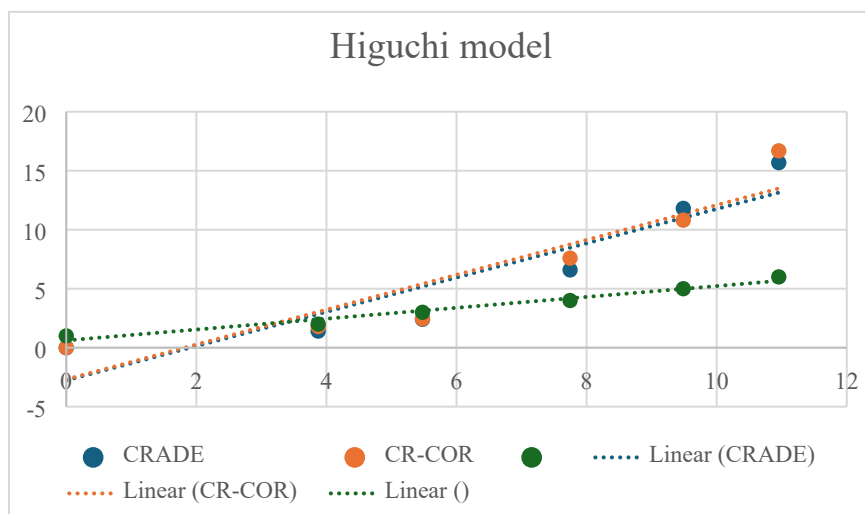

**Figure S18.** Higuchi model in SGF

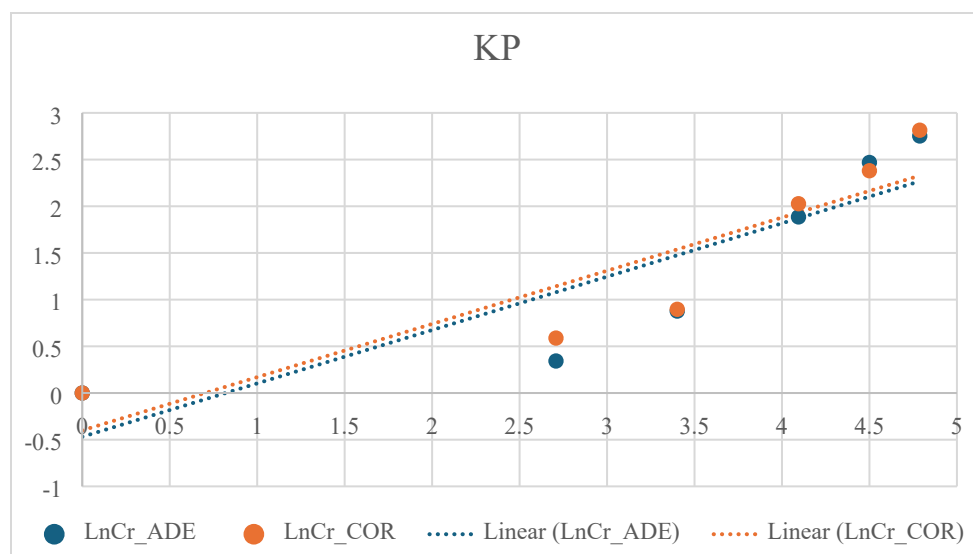

**Figure S19.** Korsmeyer-Peppas model in SGF

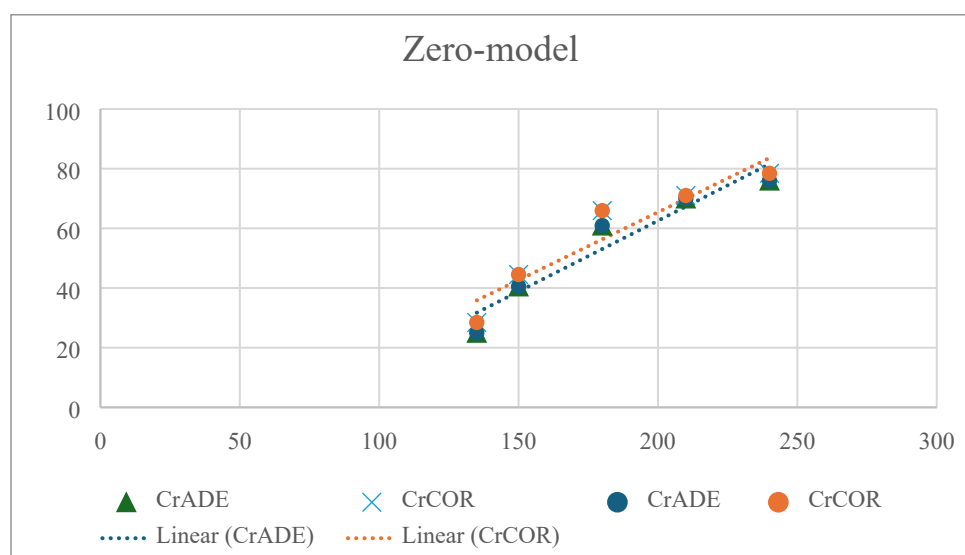

**Figure S20.** Zero-model in SIF

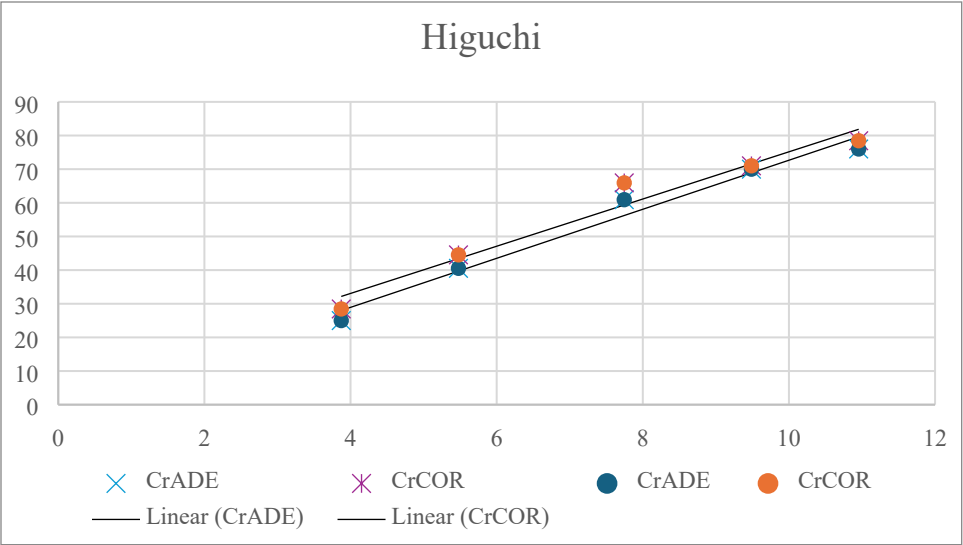

**Figure S21.** Higuchi model in SIF

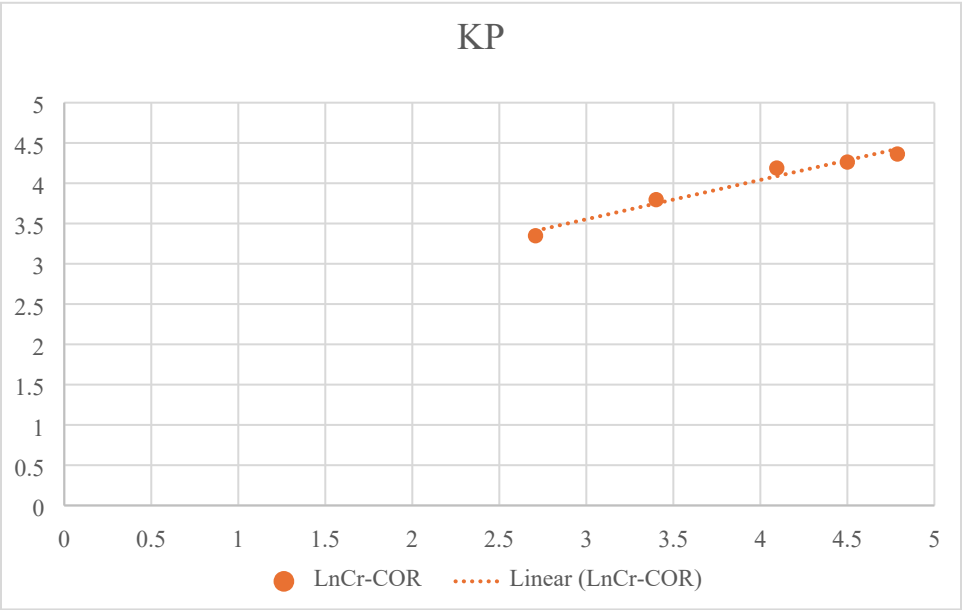

**Figure S22.** COR\_KP model in SIF

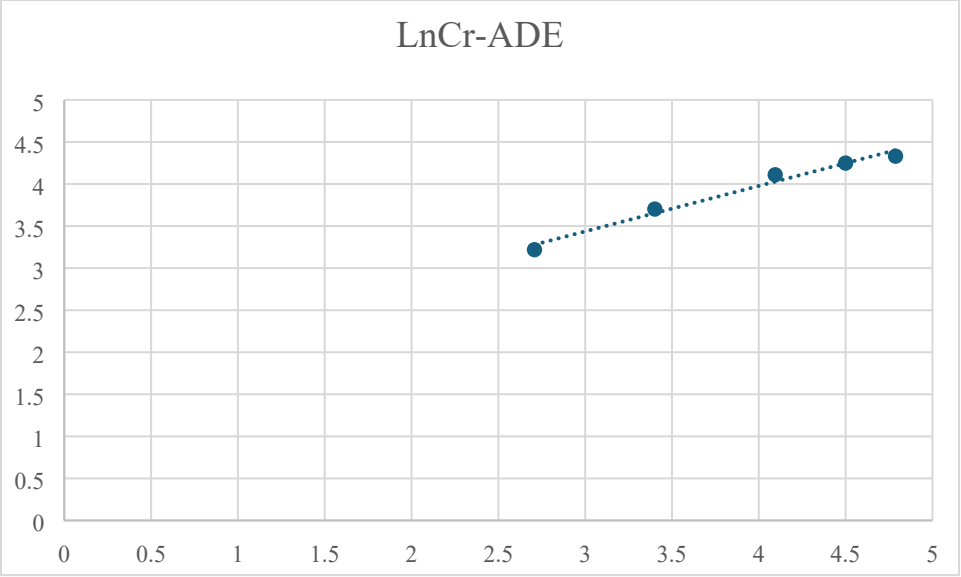

**Figure S23.** ADE\_KP model in SIF
